# Supplementary material for: Biotoxicological Analyses of Trimeroside from Baccharis trimera Using a Battery of In Vitro Test Systems
Source: Hindawi journal article supplement (doi:10.1155/2018/7804135), 2018-01-01

## Supporting information

### Biotoxicological analyses of trimeroside from *Baccharis trimera* using in vitro systems

Marcela Silva dos Santos<sup>1</sup>, Juliana da Silva<sup>1</sup>, Ana Paula Simões Menezes<sup>2</sup>, Francisco Maikon Corrêa de Barros<sup>3</sup>, Maria Luisa Brodt Lemes<sup>1</sup>, Raíssa R. Rossatto<sup>1</sup>, Cleverson. Feistel<sup>1</sup>, Indara Dedigo de Almeida<sup>1</sup>, Ivana Gricivich<sup>1</sup>, Lismare Prado<sup>1</sup>, Jaqueline Nascimento Picada<sup>1</sup>, Alexandre de Barros Falcão Ferraz<sup>1</sup>

#### Affiliation

<sup>1</sup>Postgraduate Programme of Cellular and Molecular Biology Applied to Health Sciences (PPGBioSaúde), Lutheran University of Brazil (ULBRA), Canoas, RS, Brazil

<sup>2</sup>Basic Health Science, University's Regional Campanha (URCAMP), Bagé, RS, Brazil

<sup>3</sup>Postgraduate Programme in Pharmaceutical Sciences (PPGCF), Federal University of Rio Grande do Sul (UFRGS), Porto Alegre, RS Brazil.

#### Correspondence

Prof. Dr. Alexandre de Barros Falcão Ferraz, Postgraduate Programme of Cellular and Molecular Biology Applied to Health Sciences Lutheran University of Brazil, Farroupilha av., 8001 Canoas - RS/ Brazil. E-mail: [alexandre.ferraz@ulbra.br](mailto:alexandre.ferraz@ulbra.br). Phone: +55 51 3477 9214 Fax: +55 51 3477 9239

**Figure S1.**  $^1\text{H}$  NMR spectra of trimeroside

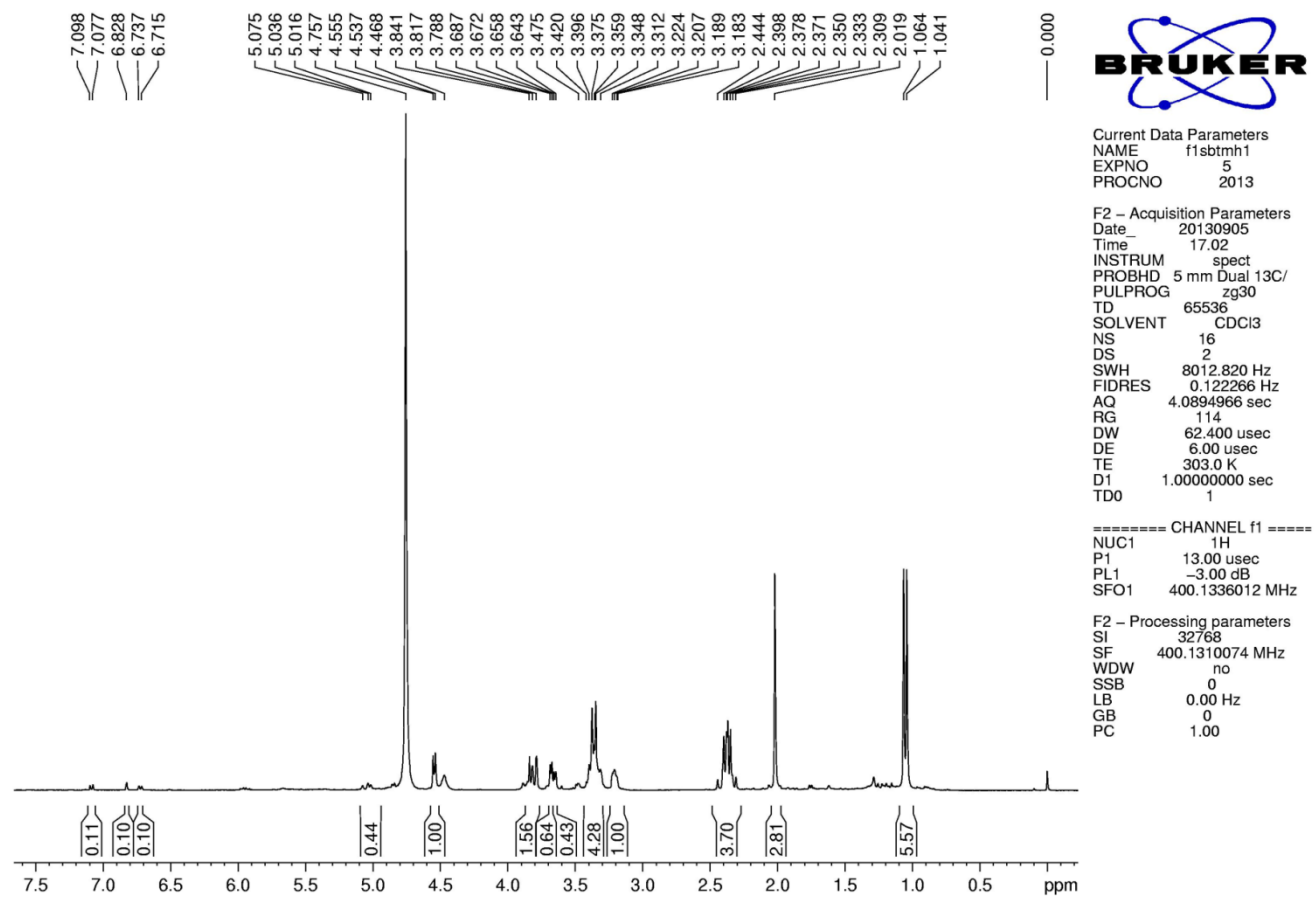

**Figure S2.**  $^{13}\text{C}$  NMR spectra of trimeroside

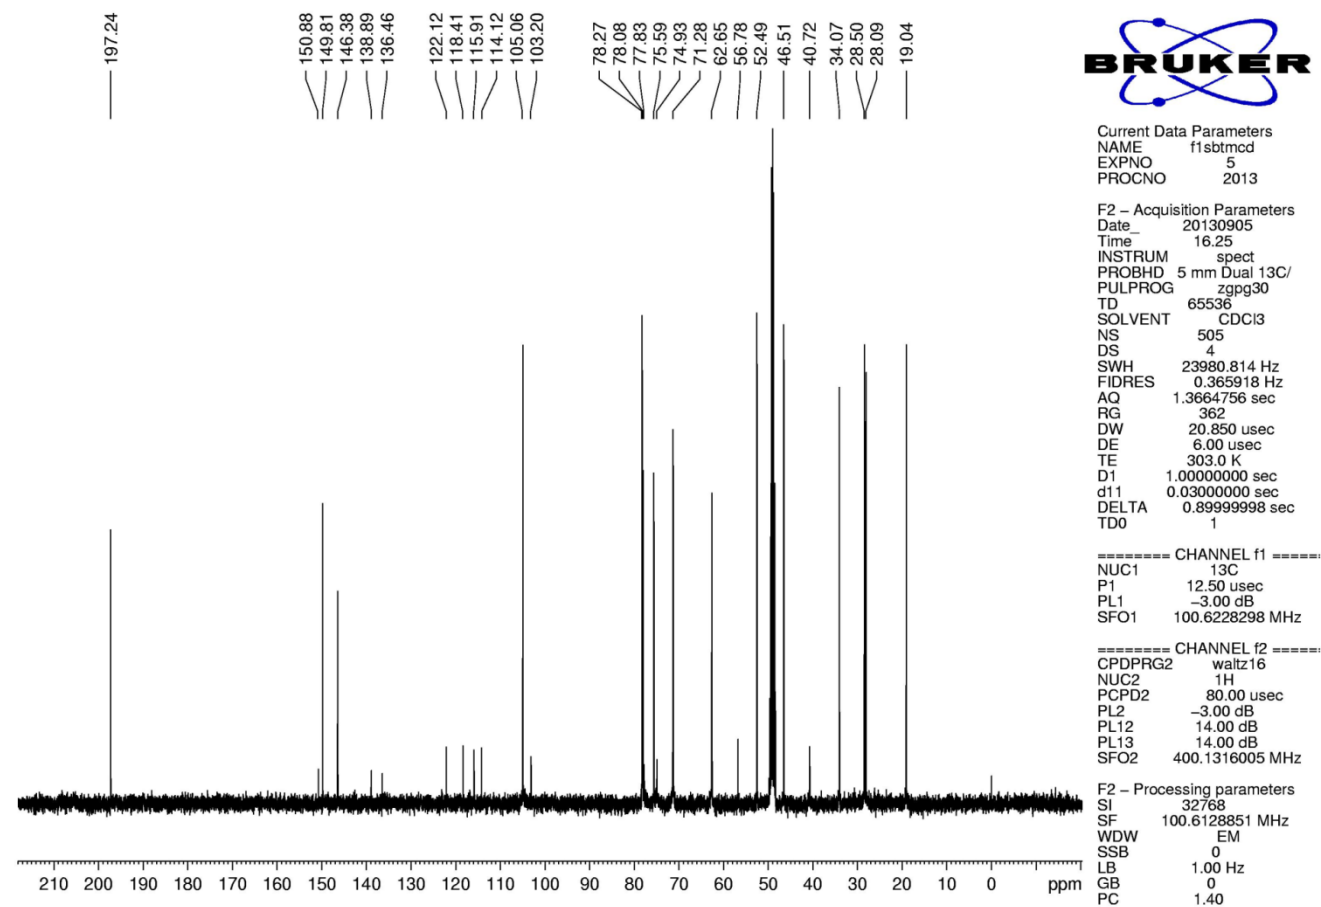

**Figure S3.** COSY spectra of trimeroside

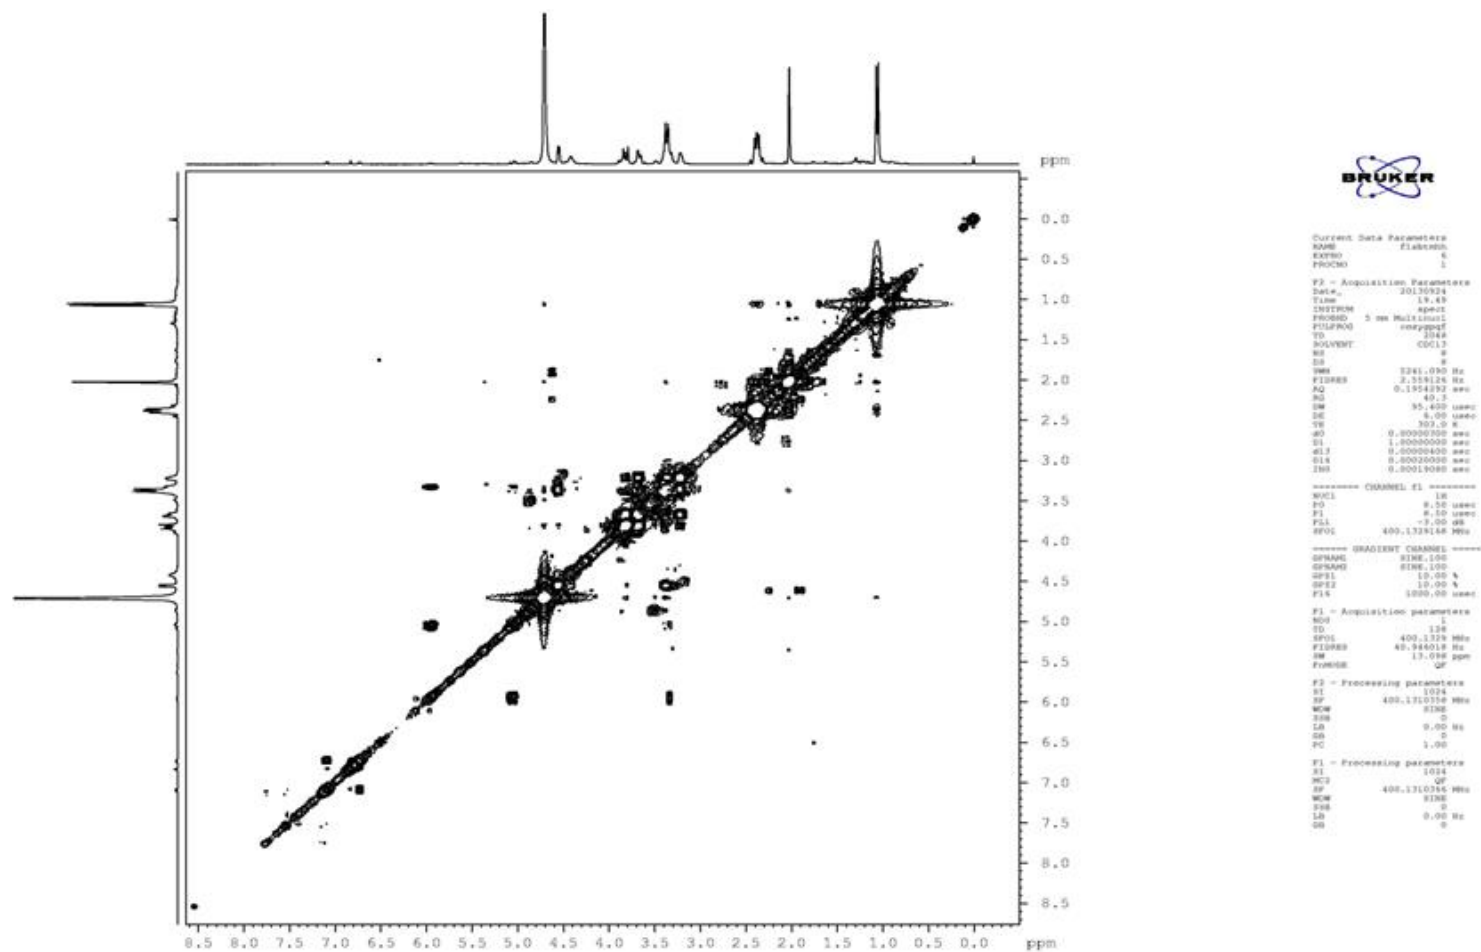

**Figure S4.** HMQC spectra of trimeroside

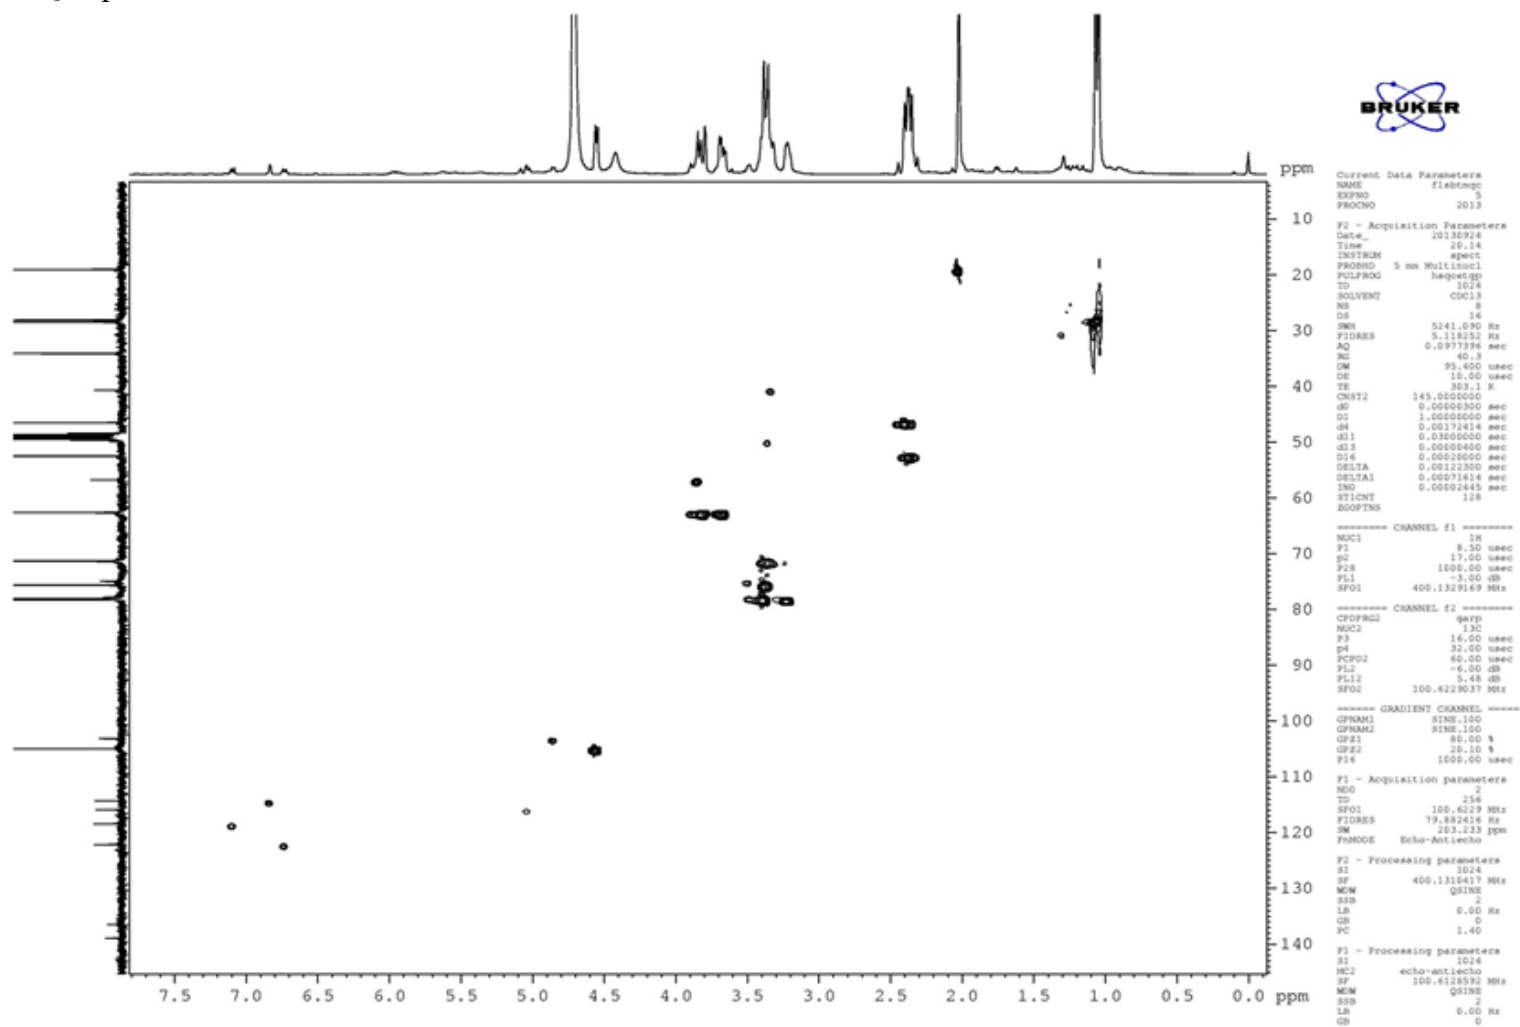

**Figure S5.** HMBC spectra of trimeroside

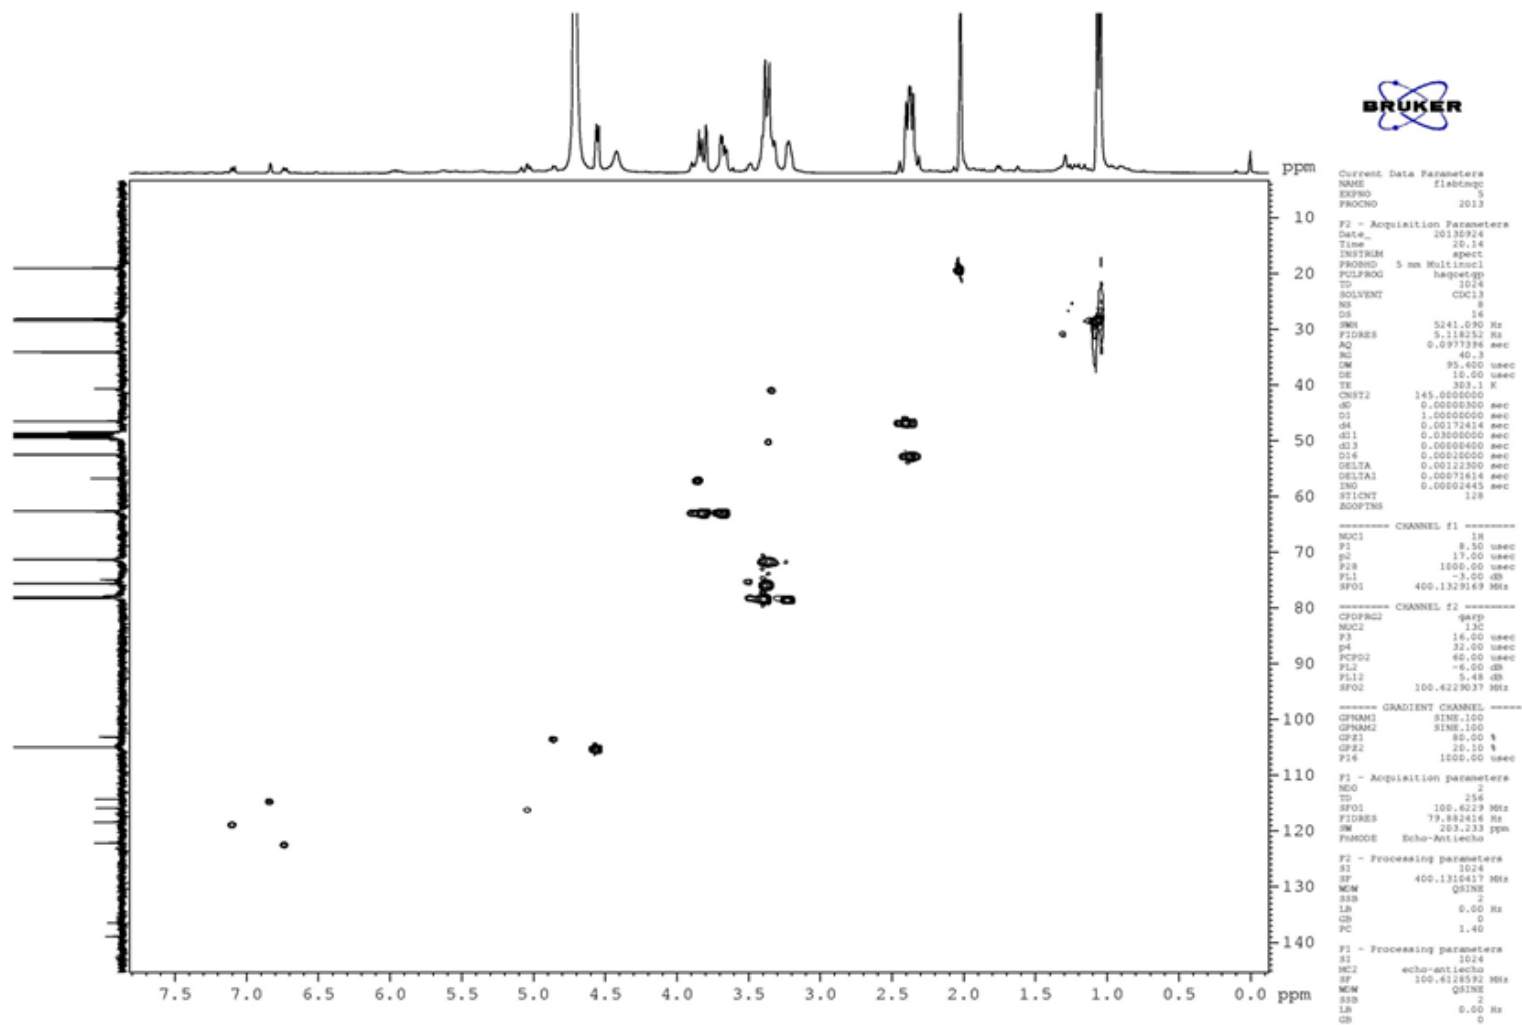

Supplement: f1 [file 7804135.f1.pdf]
